# Supplementary material
Source: PubMed Central journal article supplement (PMC3865793)
Supplement: DS_10.1177_0022034513510944.pdf [file DS_10.1177_0022034513510944.pdf]

D.M. Lyaruu<sup>1</sup>, J.F. Medina<sup>2</sup>, S. Sarvide<sup>2</sup>,  
T.J.M. Bervoets<sup>1</sup>, V. Everts<sup>1</sup>, P. DenBesten<sup>3</sup>,  
C.E. Smith<sup>4</sup>, and A.L.J.J. Bronckers<sup>1\*</sup>

<sup>1</sup>Department of Oral Cell Biology, Academic Centre for Dentistry Amsterdam, University of Amsterdam, and MOVE Research Institute, VU University Amsterdam, Amsterdam, Netherlands; <sup>2</sup>Division of Gene Therapy and Hepatology, School of Medicine/CIMA, University of Navarra, and Ciberehd, Pamplona, Spain; <sup>3</sup>Department of Oral Sciences, University of California, San Francisco, CA, USA; and <sup>4</sup>Facility for Electron Microscopy Research, Department of Anatomy and Cell Biology and Faculty of Dentistry, McGill University, Montreal, Canada; \*corresponding author, a.bronckers@acta.nl

## Barrier Formation: Potential Molecular Mechanism of Enamel Fluorosis

*J Dent Res* DOI: 10.1177/0022034513510944

### APPENDIX

**Appendix Table 1.** Composition of Enamel from Fluorotic Homozygous Wild-Type Mice and Fluorotic Heterozygous *Ae2a,b* Mice Shows No Significant Differences between the Heterozygous Mutant and Homozygous Wild-Type Mice, Means  $\pm$  SD

| Element                       | Maturation Stage (% Weight)                     |                                           |                                      | <i>p</i> * |
|-------------------------------|-------------------------------------------------|-------------------------------------------|--------------------------------------|------------|
|                               | Fluorotic Heterozygous<br><i>Ae2a,b</i> (n = 7) | Fluorotic Homozygous<br>Wild Type (n = 3) | Nonfluorotic Homozygous<br>Wild Type |            |
| CaO                           | 45.8 $\pm$ 3.8                                  | 42.6 $\pm$ 4.2                            | 50.2 $\pm$ 0.2                       | .95        |
| P <sub>2</sub> O <sub>5</sub> | 34.9 $\pm$ 2.3                                  | 34.2 $\pm$ 4.3                            | 41.8 $\pm$ 0.2                       | .80        |
| MgO                           | 0.22 $\pm$ 0.10                                 | 0.22 $\pm$ 0.23                           | 0.21 $\pm$ 0.05                      | .84        |
| SO <sub>3</sub>               | 0.18 $\pm$ 0.22                                 | 0.05 $\pm$ 0.05                           | 0.01 $\pm$ 0.01                      | .36        |
| Cl                            | 0.24 $\pm$ 0.04                                 | 0.21 $\pm$ 0.04                           | 0.34 $\pm$ 0.01                      | .28        |
| F                             | 0.11 $\pm$ 0.06                                 | 0.19 $\pm$ 0.15                           | 0.04 $\pm$ 0.01                      | .27        |

\*Unpaired *t* test: fluorotic heterozygous vs. fluorotic homozygous mice. Collected data from various experiments. Fluorotic mice were exposed for 6 weeks to 100 mg/L of F in drinking water.

**Appendix Table 2.** Values Calculated by Analysis of Variance, *p* (Data to Table)

|                                                                | Calcium    |               | Magnesium |            |
|----------------------------------------------------------------|------------|---------------|-----------|------------|
|                                                                | Secretion  | Maturation    | Secretion | Maturation |
| Among all 4 groups                                             | .288       | .0022         | .064      | .0024      |
| WT vs. WT+F                                                    | —          | —             | —         | —          |
| WT vs. <i>Ae2a,b<sup>-/-</sup></i>                             | —          | < .01         | —         | —          |
| WT vs. <i>Ae2a,b<sup>-/-</sup></i> +F                          | —          | < .05         | —         | < .01      |
| WT+F vs. <i>Ae2a,b<sup>-/-</sup></i> +F                        | —          | —             | —         | < .01      |
| WT+F vs. <i>Ae2a,b<sup>-/-</sup></i>                           | —          | < .05         | —         | —          |
| <i>Ae2a,b<sup>-/-</sup></i> vs. <i>Ae2a,b<sup>-/-</sup></i> +F | —          | —             | —         | —          |
|                                                                | Phosphorus |               | Fluoride  |            |
| Among all 4 groups                                             | .3299      | .0008         | .083      | .004       |
| WT vs. WT+F                                                    | —          | —             | —         | —          |
| WT vs. <i>Ae2a,b<sup>-/-</sup></i>                             | —          | < .001        | —         | —          |
| WT vs. <i>Ae2a,b<sup>-/-</sup></i> +F                          | —          | < .05         | —         | < .05      |
| WT+F vs. <i>Ae2a,b<sup>-/-</sup></i> +F                        | —          | —             | —         | < .05      |
| WT+F vs. <i>Ae2a,b<sup>-/-</sup></i>                           | —          | < .05         | —         | —          |
| <i>Ae2a,b<sup>-/-</sup></i> vs. <i>Ae2a,b<sup>-/-</sup></i> +F | —          | —             | —         | < .01      |
|                                                                | Sulphur    |               | Chloride  |            |
| Among all 4 groups                                             | .260       | .245          | .0323     | .0001      |
| WT vs. WT+F                                                    | —          | —             | —         | < .001     |
| WT vs. <i>Ae2a,b<sup>-/-</sup></i>                             | —          | —             | —         | < .001     |
| WT vs. <i>Ae2a,b<sup>-/-</sup></i> +F                          | —          | —             | —         | < .001     |
| WT+F vs. <i>Ae2a,b<sup>-/-</sup></i> +F                        | —          | —             | —         | < .001     |
| WT+F vs. <i>Ae2a,b<sup>-/-</sup></i>                           | —          | —             | —         | < .001     |
| <i>Ae2a,b<sup>-/-</sup></i> vs. <i>Ae2a,b<sup>-/-</sup></i> +F | —          | —             | —         | —          |
|                                                                | Ca/P       |               | Cl/Ca     |            |
| Among all 4 groups                                             | .847       | .204 (n = 18) | .0013     | < .0001    |
| WT vs. WT+F                                                    | —          | —             | < .01     | —          |
| WT vs. <i>Ae2a,b<sup>-/-</sup></i>                             | —          | —             | < .01     | < .001     |
| WT vs. <i>Ae2a,b<sup>-/-</sup></i> +F                          | —          | —             | < .01     | < .001     |
| WT+F vs. <i>Ae2a,b<sup>-/-</sup></i> +F                        | —          | —             | —         | < .001     |
| WT+F vs. <i>Ae2a,b<sup>-/-</sup></i>                           | —          | —             | —         | < .001     |
| <i>Ae2a,b<sup>-/-</sup></i> vs. <i>Ae2a,b<sup>-/-</sup></i> +F | —          | —             | —         | < .05      |

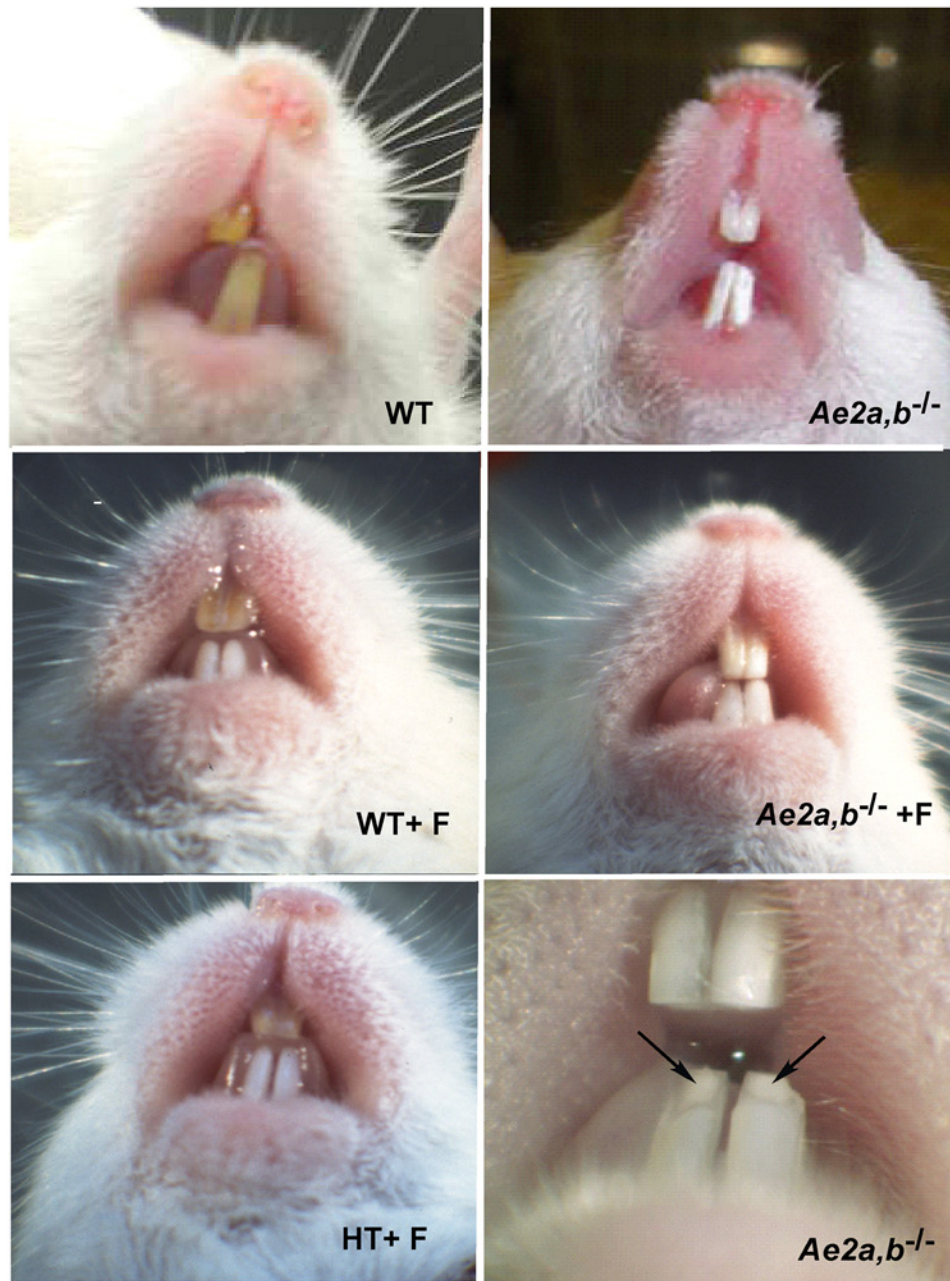

**Appendix Figure 1.** Changes in color of incisor enamel. Enamel of wild-type (WT) mice is orange (left, top). Incisors of fluorotic wild-type (WT+F) and heterozygous (HT+F) mice are more weakly stained. Enamel of  $Ae2a,b^{-/-}$  and fluorotic  $Ae2a,b^{-/-}$  ( $Ae2a,b^{-/-}$  + F) mice are chalky white. Bottom right shows erosion of incisor enamel in an  $Ae2a,b^{-/-}$  mouse.

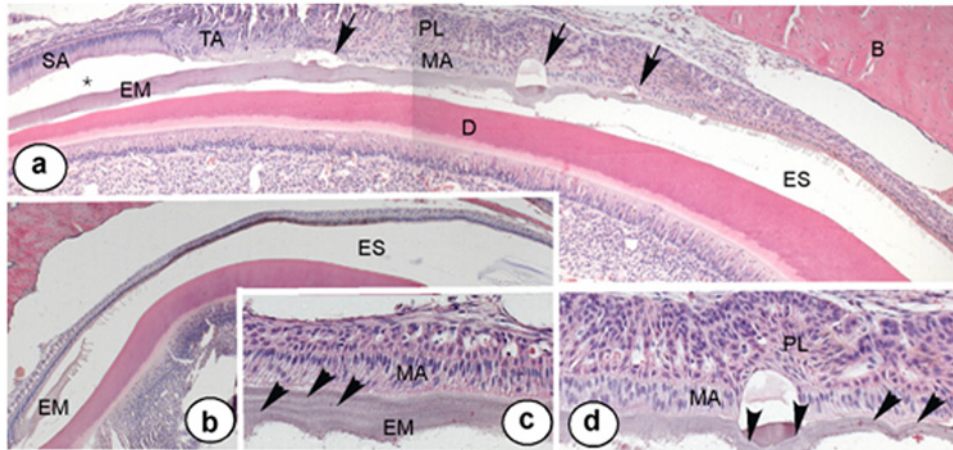

**Appendix Figure 2.** Histology of nonfluorotic and fluorotic enamel from *Ae2a,b<sup>-/-</sup>* mice (decalcified sections). (a, c, d) Fluorotic enamel from *Ae2a,b<sup>-/-</sup>* mice with typical changes seen when wild-type rodents are exposed to a single high level of F but not in chronic exposure to fluoridated drinking water: cysts (a; arrows) and hypermineralized lines (c, d) in enamel matrix indicated by the presence of less intense hematoxylin-stained lines (arrow heads). (a, c, d) Retention and delayed matrix removal. After local detachment at transition–early maturation, the ameloblast layer reattaches in incisal direction (a) and forms a coherent layer. Ameloblasts and papillary layer shorten more than in wild-type controls (b: wild-type control). B, bone; de, dentin; em, enamel matrix; es, enamel space; ma, maturation ameloblasts; pl, papillary layer; sa, secretory ameloblasts; ta, transitional ameloblasts; \*, artifact. (e-h) Hematoxylin and eosin.

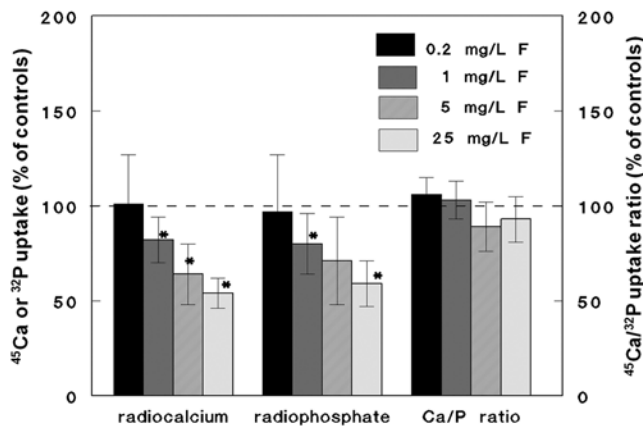

**Appendix Figure 3.** Hamster molar tooth organ cultures with enamel containing a deep fluorotic hypermineralized line take up less mineral ions. Pairs of first upper molar tooth germ of hamster pups were grown in culture (see Bronckers *et al.*, 1984 [*Arch Oral Biol* 29:803-810]). At the second day of culture, explants in the early secretory stage were exposed overnight to 0.2, 1, 5, or 25 mg/L of F or equimolar NaCl (contralateral controls). Next day, the explants were transferred to fresh F-free medium and grown for another 5 days, with medium refreshed every other day. For the last 24 hrs of culture, explants were labeled with  $^{45}\text{Ca}^{2+}$  and  $^{32}\text{PO}_4^{3-}$  (1  $\mu\text{Ci}$  per mL), the radiolabels were extracted from the explants with 10% ice-cold trichloroacetic acid and counted for  $^{45}\text{Ca}$  and  $^{32}\text{P}$ . For the paired organ cultures, statistical significance was determined by Student *t* test for paired samples and, all other data, by the unpaired *t* test at  $p < .05$ . Uptake is expressed as percentage of control (paired *t* test; \* $p < .05$ ; means and standard deviation;  $n = 5$ ).
